# Supplementary material for: Substrate stiffness induced mechanotransduction regulates temporal evolution of human fetal neural progenitor cell phenotype, differentiation, and biomechanics
Source: Royal Society of Chemistry journal article supplement (doi:10.1039/d0bm01349h), 2020-01-01
Supplement: d0bm01349h1.pdf [file d0bm01349h1.pdf]

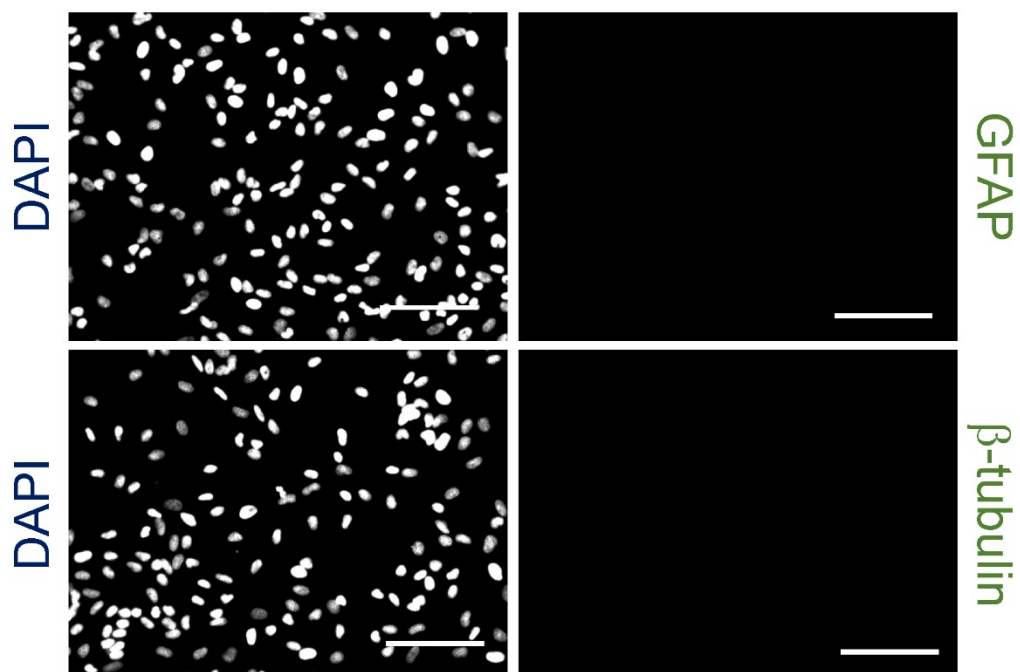

**Supplementary Figure 1.** Representative (individual channels) immunofluorescence images of GFAP and  $\beta$ III-tubulin stained cells after priming. DAPI staining shows the nuclei, while lack of staining for these two primary antibodies in these cultures indicate lack of hNPC differentiation.

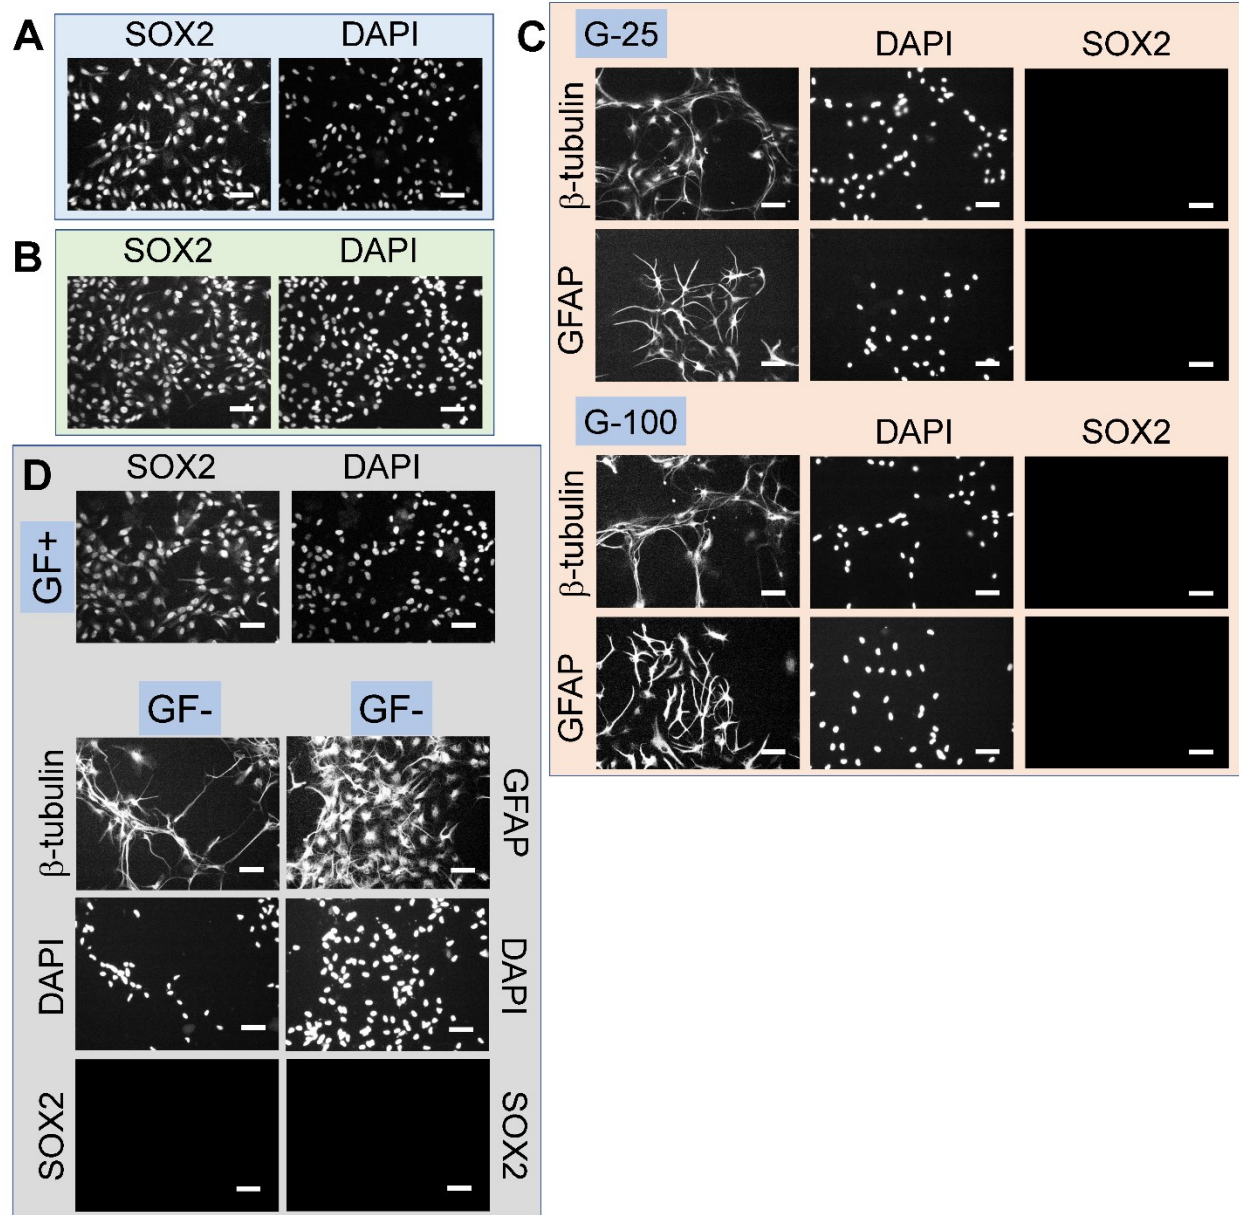

**Supplementary Figure 2.** Representative SOX-2 and DAPI (cell nuclei) labeled immunofluorescence images of cells (**A**) in the presence of *complete medium*, after priming three days in culture, and (**B**) cultured on TCPS, three days post-priming, in the presence of *complete medium*. (**C**) Representative immunofluorescence images of star-shaped and elongated cells on G-25 and G-100 gels, nine days post-priming, in *complete medium*. Primary antibodies for SOX2,  $\beta$ III-tubulin, and GFAP were used. Staining for SOX2 was not evident. Cultures were counterstained with DAPI for cell nuclei identification. (**D**) Representative immunofluorescence images of cells after nine days of culture on laminin coated TCPS in the presence of *complete medium* or *maintenance medium*. Primary antibodies for SOX2,  $\beta$ III-tubulin, and GFAP were used with appropriate secondary antibodies. Cultures were counterstained with DAPI for cell nuclei identification. SOX2 staining was not evident in the GF- cultures, while GFAP and  $\beta$ II-tubulin staining was not evident in GF+ cultures. Scale bar: 50  $\mu$ m.
